# Supplementary material
Source: publisher figshare collection journal article supplement (https://tandf.figshare.com/ndownloader/files/14025767)
Supplement: Supplementary file 1 [file 14025767]

# Appendix

Table 7 Sample of tweets for each category of information. C (Category), P (Probability)

| C | 2017 EST | Tweet | P |
| --- | --- | --- | --- |
| Advice, warning and alerts | Thu Aug 31 20:28 | CNN talking about Hurricane Irma; now a Category 4 storm making its way across the Atlantic. European model says Bermuda. US Cape Cod. | 0.56 |
| Thu Sep 07 11:19 | Hurricane Watch now posted for Miami and southern areas of Florida... | 0.41 |
| Thu Sep 07 17:27 | They got Irma shifting west now | 0.83 |
| Fri Sep 08 10:19 | Hurricane Warning In Effect for All of South Florida; Irma Winds at 150 MPH | NBC 6 South Florida via | 0.64 |
| Fri Sep 08 19:25 | Unless your in a storm surge area better off staying home this late. | 0.92 |
| Sat Sep 09 11:47 | LATEST: â€¢ Irma is now a Cat 3 storm â€¢ It is forecast to reach the Florida Keys Sunday morning â€¢ About 5.6 millions¦ | 0.94 |
| Sun Sep 10 10:59 | Hurricane Irma is starting to move west | 0.3 |
| Sun Sep 10 23:13 | NWS reporting Lake County Fire Dept states the Umatilla Tavern on 19 has sustained substantial damage from a possible tornado around 6:30 | 0.96 |
| Mon Sep 11 02:47 | power just went out and there's also a flash flood warning for the next two hours it's lit boys | 0.67 |
| Sun Sep 24 17:02 | 5pm EDT Sunday: Tropical storm & storm surge watches issued for a portion of the coast of North Carolina for . | 0.89 |
| Disrupted services | Wed Sep 06 14:16 | With Broward schools closed tomorrow-Friday; Young at Art museum is hosting a one-day hurricane camp. â€¦ | 0.81 |
| Thu Sep 07 13:39 | Due to Hurricane Irma; our office will be closed Monday; September 11th. | 0.92 |
| Fri Sep 08 13:29 | Arc of Ala main campus closed on Mon.; Sept. 11 due to Hurricane Irma. Will follow lead of Ala Co Pub Sch re: Sept.¦ | 0.77 |
| Fri Sep 08 22:25 | Due to Hurricane Irma; all MTC campuses will be closed Monday;Sept.11. | 0.92 |
| Sat Sep 09 07:56 | Hurricane Irma Shuts Down Disney World | 0.59 |
| Sat Sep 09 09:48 | St. Johns Golf Club is closed due to Hurricane Irma and will reopen when conditions warrant. Patrons with reservations will be contacted. | 0.35 |
| Mon Sep 11 09:29 | Due to Hurricane Irma; we continue to update the hours of our stores. Updated lists | 0.94 |
| Tue Sep 12 08:36 | second day without power in Gwinnett county; no crews... irma sweeps into Georgia; claiming three lives in the state | 0.36 |
| Tue Sep 12 13:03 | We are closed for a few days due to Hurricane Irma. | 0.83 |
| Thu Sep 14 14:31 | The fun must still go on! Due to Hurricane Irma; our Summer Networker has been postponed until futher notice. | 0.14 |
| Donations and support | Wed Aug 30 12:33 | Support our affiliates disaster recovery efforts through our National Office | 0.81 |
| Wed Aug 30 18:12 | I'm so glad I had the chance to donate baby formula and clothes to those affected by hurricane Harvey; | 0.95 |
| Sun Sep 10 10:57 | Today; from 12-5pm; is the last day for our Hurricane Harvey Relief Drive! We will be packing all your donations... | 0.74 |
| Sun Sep 10 13:51 | Here's how to help victims of Hurricane Irma -- even if everyone gives just a little; the impact we can have will mâ€¦ | 0.59 |
| Sun Sep 10 18:30 | Here’s How To Help The Victims Of Hurricane Irma Money; blood and shelter are all needed | 0.83 |
| Mon Sep 11 14:15 | UPDATE! We have updated our campaign in order to contribute to the hurricane relief efforts in Texas and Florida.... | 0.58 |
| Tue Sep 12 20:59 | I just donated to ; a benefit for hurricane relief. Donate to help those who need it most at ANYTHING! | 0.94 |
| Sun Sep 24 15:19 | Portion of all proceeds going to hurricane relief funds to help our ppldem in the Caribbean | 0.68 |
| Fri Sep 29 19:21 | My 4th graders had an art show to raise money for hurricane victims! They made $240!! | 0.83 |
| Sat Sep 30 13:45 | Help out Puerto Rico from the aftermath of hurricane Irma by donating to the Red Cross. As long as you can donate you can make a difference | 0.58 |
| Government critiques | Mon Sep 04 17:44 | Hurricane Harvey offers lessons Republicans will probably ignore | 0.92 |
| Thu Sep 07 11:43 | The three members of congress that voted against aid for Hurricane Harvey were all republicans. Sad. | 0.94 |
| Thu Sep 07 12:20 | I’m blaming this hurricane on Trump goodnight | 0.74 |
| Fri Sep 08 00:17 | Someone who was brags about how much they love Trump is coming to spend the hurricane weekend at my house; so I'm going to wait outside. | 0.36 |
| Fri Sep 08 11:20 | Just heard the best quote; 'Donald Trump is the hurricane 'Irma' of presidents... | 0.78 |
| Fri Sep 08 11:57 | Islamic State & Hillary Supporters Beg Hurricane Irma- Destroy Trump's America! LEFT/ISSI ONE&SAME! BOTH HATE USA!! | 0.96 |
| Fri Sep 08 19:36 | I would send Trump & all climate deniers to sit naked in the middle of Florida & see what they'd think of Irma | 0.32 |
| Mon Sep 11 00:08 | Trump's concern for his properties vs safety of Storm victims is obvious. He's 'lucky | 0.48 |
| Thu Sep 14 11:14 | Tell Congress: Condemn climate denial. Admit that climate change is making storms like Irma much worse. | 0.96 |
| Sun Oct 01 23:57 | Trump dedicates a golf trophy to hurricane victims. What a joke of a president. Hiding in his golf resort | 0.96 |
| Sympathy and Prayers | Thu Sep 07 21:54 | Praying you and your family are safe from hurricane Irma | 0.91 |
| Fri Sep 08 08:22 | Our thoughts and prayers are with everyone who have already felt Hurricane IRMA's wrath and also with those who... | 0.63 |
| Fri Sep 08 13:01 | Praying for hurricane victims. | 0.68 |
| Sat Sep 09 02:50 | i hope all my pals stay safe!! make sure to have tons of supplies; a route to leave mayb; and be able to contact emergency services! | 0.57 |
| Sun Sep 10 07:12 | Storm still far south but we are experiencing its effects already. Stay safe! | 0.94 |
| Sun Sep 10 09:04 | Prayers for those affected by hurricane Irma today and tomorrow and over the past days | 0.83 |
| Sun Sep 10 12:30 | Be safe Army in mexico & pray for people in Florida who affected by hurricane irma too | 0.83 |
| Sun Sep 10 19:43 | Our thoughts are with everyone being effected by Hurricane Irma. Stay safe keeping you in our thoughts. | 0.95 |
| Sun Sep 10 21:56 | Prayers to everyone who was seriously affected by Hurricane Irma. The storm has dissipated and hopefully my town is safe now | 0.63 |
| Sun Sep 10 23:33 | Prayers to all of our members tonight as Hurricane Irma crosses Florida. Stay safe and heed the warning from your local officials. | 0.67 |
| Affected individuals and pets | Wed Sep 06 18:20 | IF YOU CAN FOSTER A DOG DURING IRMA PLS LET ME KNOW BDRR NEEDS YOU HELP !!!!!!!!!!! | 0.58 |
| Fri Sep 08 12:49 | Prayers to all affected by Irma & hoping anyone who can; helps an animal in need of shelter | 0.55 |
| Fri Sep 08 15:52 | Man the Hurricane shifted west directly towards Polk If this shit Flood Imma be stressing my dogs need to be safe too | 0.42 |
| Fri Sep 08 17:42 | i feel so bad for all the animals being left behind during the hurricane | 0.88 |
| Sun Sep 10 20:32 | 'After a hurricane in Texas; this man spent rescuing all the dogs that were left behind. How can you not admire a hâ€¦ | 0.54 |
| Sun Sep 10 22:29 | idk why people decided to abandon their dogs before the hurricane they definitely could have sent them to my house somehow? | 0.47 |
| Mon Sep 11 12:05 | dogs cannot fend for themselves if ppl leave them tied to a tree or trapped in the house when a hurricane is coming wtf is wrong with y'all | 0.24 |
| Mon Sep 11 20:27 | Floridians convert their laundry room into a stable to keep their horses safe during Hurricane Irma. | 0.48 |
| Tue Sep 12 08:51 | Pets are being taken from ravaged storm areas at a record pace. Urging everyone to update microchips info! | 0.35 |
| Tue Sep 12 18:16 | Woman Leaves Back Door Open As Storm Approaches; Then Walks Inside To Find 3 Baby Deer | 0.95 |
| News during | Thu Sep 07 20:53 | Hurricane Irma live updates: storm pummels Haiti and heads for Bahamas and Florida | 0.96 |
| Fri Sep 08 11:26 | (With Video) Irma heads for Bahamas; leaving devastation in its wake - Hurricane Irma hurtled north of the... | 0.85 |
| Sat Sep 09 15:25 | Irma shifts: The prime target is now Tampa; not Miami - U.S. - Stripes | 0.54 |
| Sun Sep 10 00:50 | Winds whip Florida Keys as Hurricane Irma turns sights northward via | 0.54 |
| Sun Sep 10 09:13 | Havana flooded and 5;000 tourists evacuated from coast as Irma hits Cuba | 0.94 |
| Sun Sep 10 09:37 | Hurricane Irma bears down on Florida Keys; at least 1 dead - ABC News - via | 0.93 |
| Sun Sep 10 13:36 | Video shows dangerous storm surge in downtown Miami | 0.93 |
| Sun Sep 10 17:23 | Hurricane Irma makes second landfall in Florida; 4 left dead via | 0.92 |
| Mon Sep 11 12:45 | Live Now: People Looting/Stealing During Hurricane Irma In Miami Florida... | 0.92 |
| Mon Sep 11 17:20 | Irma heads north; leaving widespread flooding in Florida -- live updates | 0.95 |
| News aftermath | Mon Sep 11 11:10 | Hurricane Irma: Video and Images From Social Media | 0.92 |
| Tue Sep 12 09:41 | Richard Branson: Decimated Caribbean islands need a 'Marshall Plan' after Irma | 0.67 |
| Tue Sep 12 20:14 | Take Action: Urge Congress to Modernize the National Flood Insurance Program in the Wake of Harvey's Destruction | 0.96 |
| Wed Sep 13 20:46 | Harvey and Irma take a huge bite out of the U.S. economy. via | 0.9 |
| Fri Sep 15 12:43 | Hurricane Harvey floodwaters loaded with E. coli from sewage; fecal bacteria | 0.81 |
| Fri Sep 15 20:12 | FACTBOX: Oil companies in Caribbean; southeast U.S. continue restart after Irma | 0.59 |
| Tue Sep 19 06:08 | Hurricane Harvey's Floodwaters Were So Extreme That They Warped Earth's Crust | 0.94 |
| Wed Sep 20 09:23 | Houston FEMA flood map missed 75 percent of flood damages; says new study via @houstonchron | 0.96 |
| Thu Sep 21 08:04 | South Florida homeowners are getting an insurance break post-Hurricane Irma via | 0.47 |
| Thu Oct 12 09:43 | Businesses; homeowners & renters whose property was damaged by may be eligible for SBA disaster loans | 0.96 |
